# Supplementary material for: Ultrasensitive and selective colorimetric detection of thiourea using silver nanoprobes
Source: Royal Society of Chemistry journal article supplement (doi:10.1039/c1an15613f), 2011-01-01
Supplement: c1an15613f.pdf [file c1an15613f.pdf]

Electronic Supplementary Information for  
Ultrasensitive and selective colorimetric detection of thiourea  
using silver nanoprobe

Guang-Li Wang\*, Yu-Ming Dong, Xiao-Ying Zhu, Wen-Jing Zhang, Cheng Wang and  
Huan-Jun Jiao

School of Chemical and Material Engineering, Jiangnan University, Wuxi 214122, P.  
R. China

E-mail: [glwang@jiangnan.edu.cn](mailto:glwang@jiangnan.edu.cn)

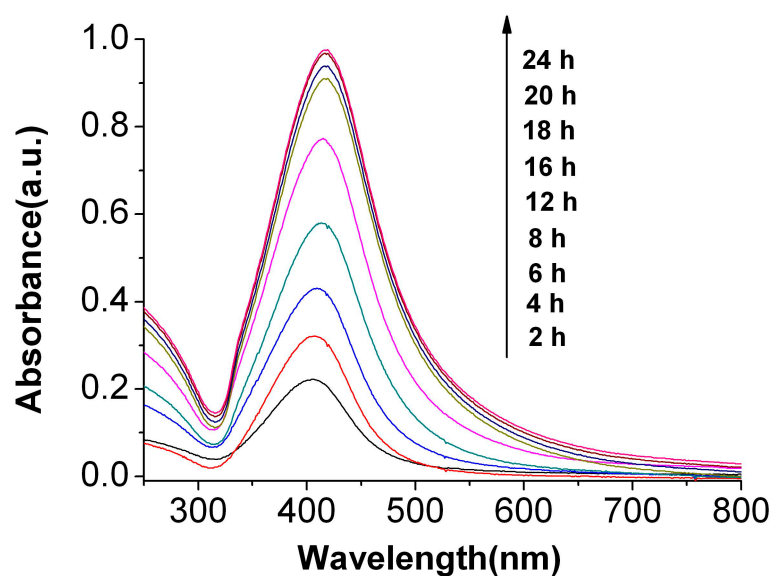

**Fig.S1** The absorption spectra of AgNPs at different reaction times. After reaction for 2 h, AgNPs was stored in a brown bottle at room temperature at different times.

**Table S1** Absorption characteristics of AgNPs in ultrapure water and in buffer solutions with different pH.

| Medium          | maximum absorption wavelength<br>(nm) | absorption intensity<br>(a.u.) |
|-----------------|---------------------------------------|--------------------------------|
| Ultrapure water | 415                                   | 0.970                          |
| pH=3.0          | 406                                   | 0.959                          |
| pH=4.0          | 408                                   | 1.035                          |
| pH=5.0          | 410                                   | 1.142                          |
| pH=6.0          | 414                                   | 1.083                          |
| pH=7.0          | 415                                   | 1.023                          |
| pH=8.0          | 419                                   | 0.964                          |
| pH=9.0          | 420                                   | 0.931                          |
